# Supplementary material for: Universal immunotherapeutic strategy for hepatocellular carcinoma with exosome vaccines that engage adaptive and innate immune responses
Source: PubMed Central journal article supplement (PMC9052531; doi:10.1186/s13045-022-01266-8), 2022-04-29
Supplement: 13045_2022_1266_MOESM1_ESM.pdf [file 13045_2022_1266_MOESM1_ESM.pdf]

## Supplementary Figures

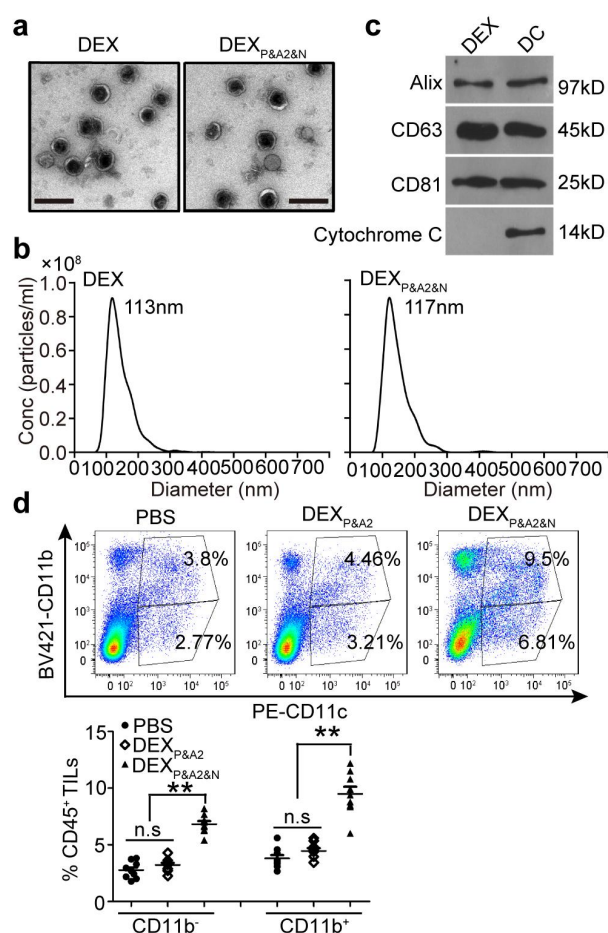

**Supplementary Figure 1.** Characterization and evaluation of DEX<sub>P&A2&N</sub> to recruit DCs to tumor of orthotopic mCherry-expressing HCC mice. **(a)** Representative transmission electron microscopic (TEM) images of DEX and DEX<sub>P&A2&N</sub> (scale bar=200nm). P-P47; A2-AFP212; N-N1ND. DEX refers to DC-derived exosomes. **(b)** Size distribution of DEX and DEX<sub>P&A2&N</sub> with nanoparticle tracking analysis (NTA). **(c)** Western blot to examine the expression of exosomal biomarkers. Total protein (30 µg) was loaded for DEX and DC. **(d)** Flow cytometric and quantitative analysis of CD11b<sup>+</sup>CD11c<sup>+</sup> and CD11b<sup>-</sup>CD11c<sup>+</sup> DCs from tumor of orthotopic HCC mice treated with DEX<sub>P&A2</sub> or DEX<sub>P&A2&N</sub> (n=9; One way-ANOVA post hoc Student-Newman-Keuls test). \*\*p<0.001; n.s means not significant.

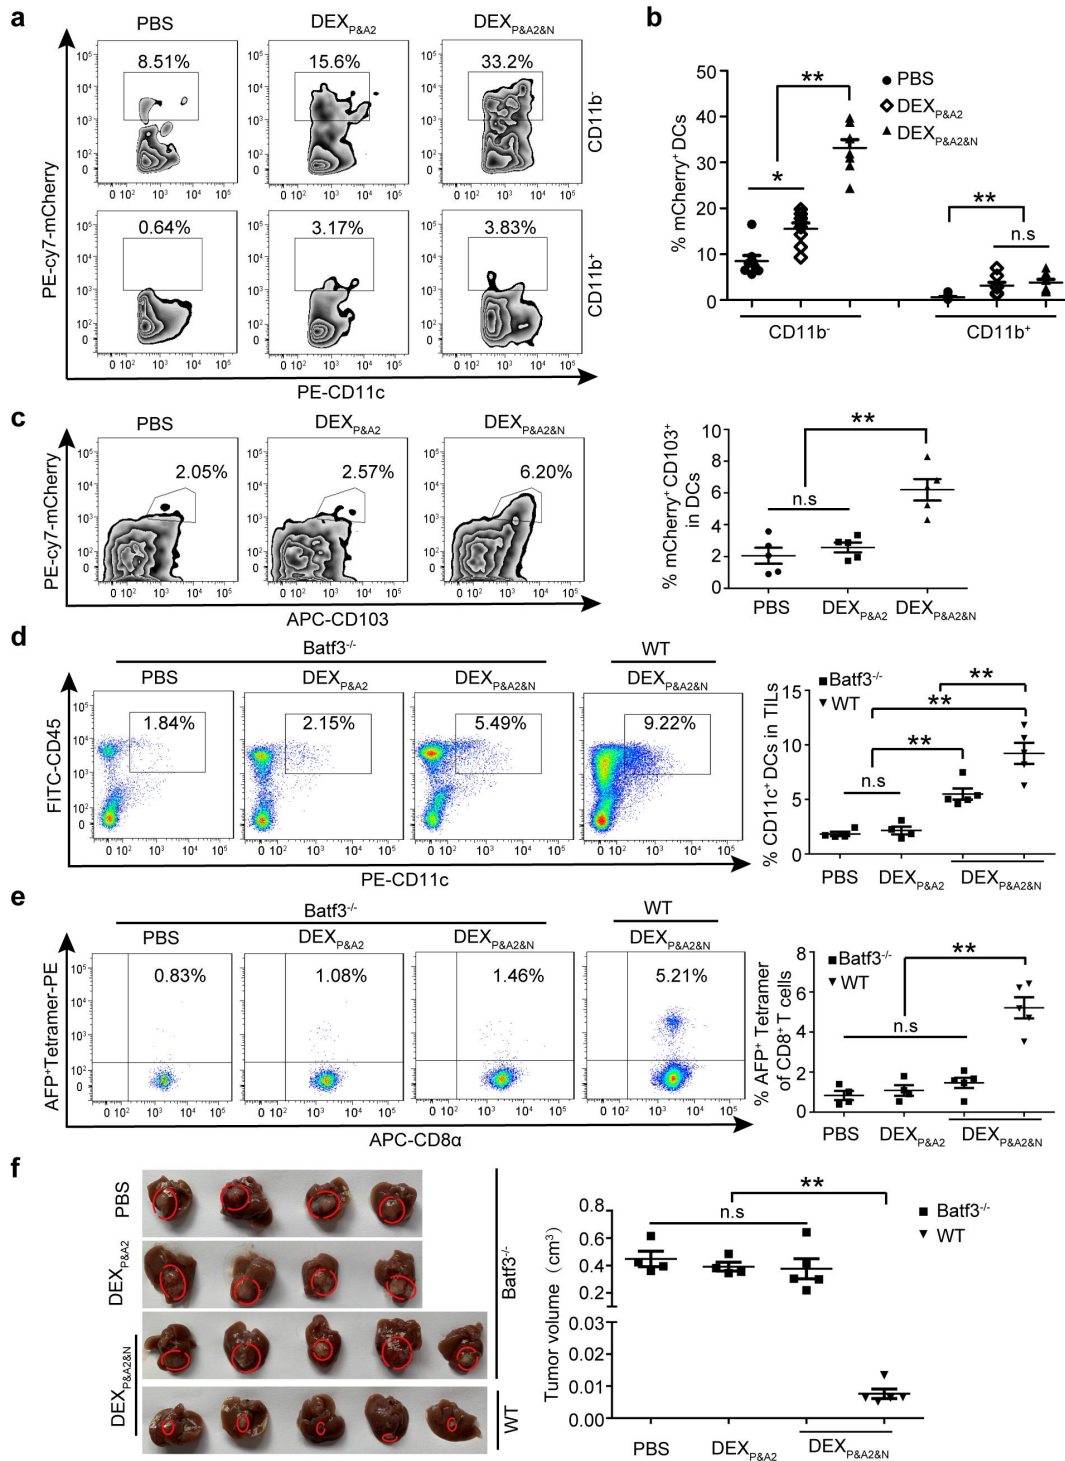

**Supplementary Figure 2.** Effects of DEX<sub>P&A2&N</sub>-mediated DC cross-presentation and antitumor responses in orthotopic HCC mice. Flow cytometric (a) and quantitative analysis (b) of mCherry<sup>+</sup>CD11b<sup>+</sup>CD11c<sup>+</sup> or mCherry<sup>+</sup>CD11b<sup>-</sup>CD11c<sup>+</sup> DCs from tumor of orthotopic HCC mice treated with DEX<sub>P&A2</sub> or DEX<sub>P&A2&N</sub> (n=8; One way-

ANOVA post hoc Student-Newman-Keuls test). (c) Flow cytometric and quantitative analysis of mCherry<sup>+</sup>CD103<sup>+</sup>CD11c<sup>+</sup> DCs in splenocytes of orthotopic HCC mice treated with DEX<sub>P&A2</sub> or DEX<sub>P&A2&N</sub> (n=5; One way-ANOVA post hoc Student-Newman-Keuls test). (d) Flow cytometric and quantitative analysis of CD11c<sup>+</sup> DCs from tumor-infiltrating lymphocytes (TILs) of orthotopic Batf3<sup>-/-</sup> HCC mice treated with PBS (n=4), DEX<sub>P&A2</sub> (n=4) or DEX<sub>P&A2&N</sub> (n=5) and orthotopic wild-type (WT) HCC mice treated with DEX<sub>P&A2&N</sub> (n=5) (One way-ANOVA post hoc Student-Newman-Keuls test). (e) Flow cytometric and quantitative analysis of AFP<sup>+</sup> tetramer T cells from tumor of orthotopic Batf3<sup>-/-</sup> HCC mice treated with PBS (n=4), DEX<sub>P&A2</sub> (n=4) or DEX<sub>P&A2&N</sub> (n=5) and orthotopic WT HCC mice treated with DEX<sub>P&A2&N</sub> (n=5) (One way-ANOVA post hoc Student-Newman-Keuls test). (f) Representative tumor images and tumor volume of orthotopic Batf3<sup>-/-</sup> HCC mice treated with PBS (n=4) DEX<sub>P&A2</sub> (n=4) or DEX<sub>P&A2&N</sub> (n=5) and orthotopic WT HCC mice treated with DEX<sub>P&A2&N</sub> (n=5) (One way-ANOVA post hoc Student-Newman-Keuls test). \*p<0.05, \*\*p<0.001; n.s means not significant.

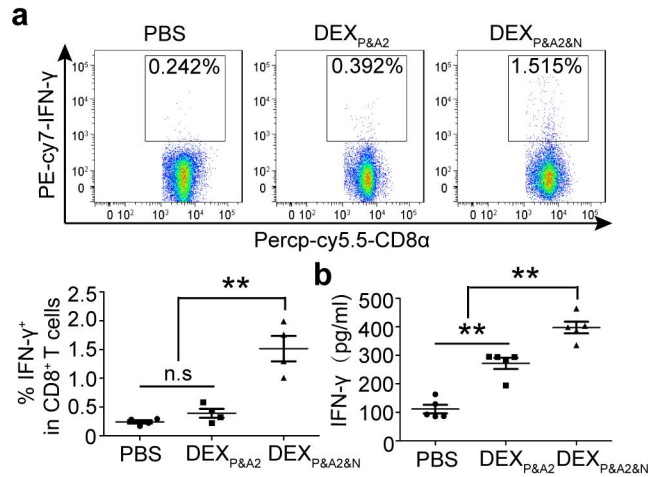

**Supplementary Figure 3.** Analysis of immune microenvironment of orthotopic HCC mice treated with DEX<sub>P&A2&N</sub>. **(a)** Flow cytometric and quantitative analysis of IFN-γ<sup>+</sup>CD8<sup>+</sup> T cells in blood of orthotopic HCC mice treated with DEX<sub>P&A2</sub> or DEX<sub>P&A2&N</sub> (n=4; One way-ANOVA post hoc Student-Newman-Keuls test). **(b)** Measurement of IFN-γ in blood of orthotopic HCC mice treated with DEX<sub>P&A2</sub> or DEX<sub>P&A2&N</sub> (n=5; One way-ANOVA post hoc Student-Newman-Keuls test). \*\*p<0.001; n.s means not significant.

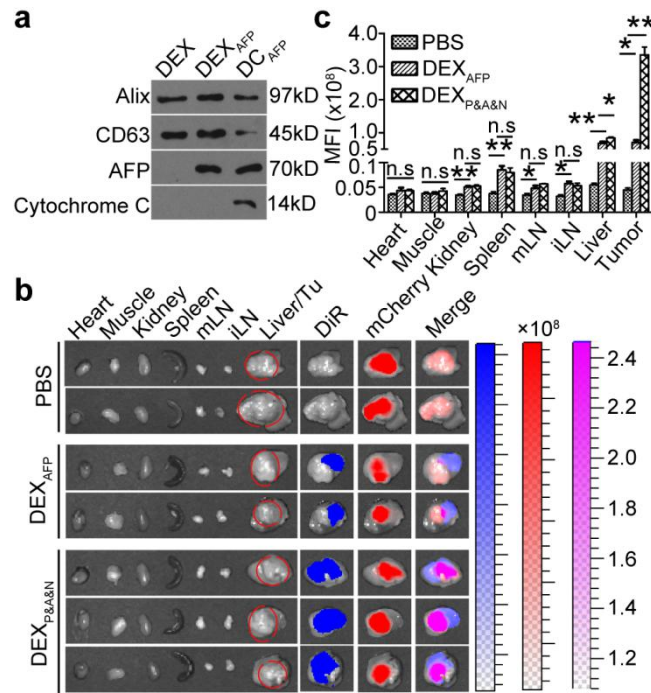

**Supplementary Figure 4.** Western blot analysis and tissue distribution of DEX<sub>AFP</sub> and DEX<sub>P&A&N</sub>. **(a)** Western blot to examine the expression of AFP on DEX. Total protein (30  $\mu$ g) was loaded for DEX and DC. DEX refer to DC-derived exosomes. Tissue distribution **(b)** and quantitative analysis **(c)** of labeled DEX<sub>P&A&N</sub>. DiR-labeled DEX<sub>AFP</sub> or DEX<sub>P&A&N</sub> (80  $\mu$ g/mouse) were injected into day-14 orthotopic HCC mice bearing mCherry-expressing tumors intravenously and tissues were harvested 2 h after injection (n=3; One way-ANOVA post hoc Student-Newman-Keuls test). mLN-mesenteric lymph node; iLN-inguinal lymph node. Tumor was circled. \*p<0.05, \*\*p<0.001; n.s means not significant.

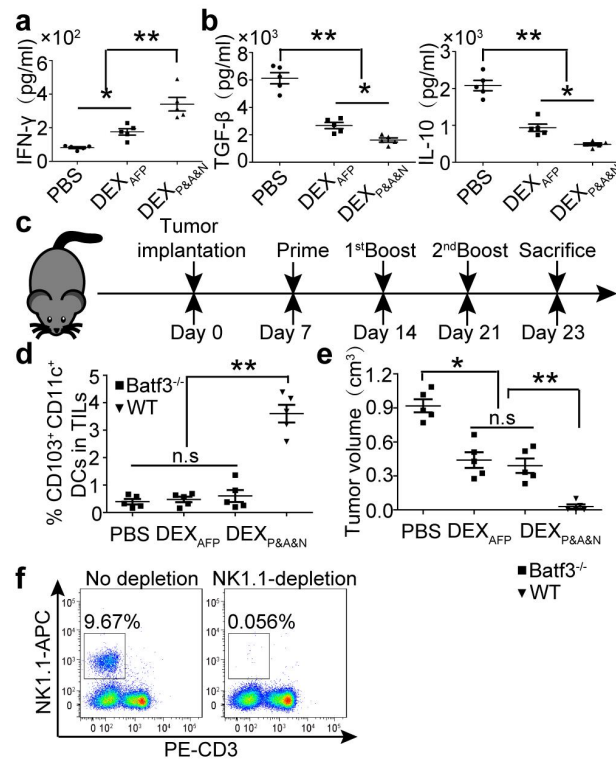

**Supplementary Figure 5.** Examination of tumor microenvironment in DEX<sub>P&A&N</sub>-treated orthotopic HCC mice bearing large tumors and NK depletion. Measurement of IFN- $\gamma$  (a) and TGF- $\beta$  and IL-10 (b) in tumor of DEX<sub>AFP</sub>- or DEX<sub>P&A&N</sub>-treated orthotopic HCC mice bearing large established tumors (n=5). (c) Diagram for dosing regimen of DEX<sub>P&A&N</sub> in orthotopic Batf3<sup>-/-</sup> HCC mice. DEX<sub>AFP</sub> or DEX<sub>P&A&N</sub> (80  $\mu$ g/mouse) were intravenously injected into day-7 orthotopic Batf3<sup>-/-</sup> HCC mice weekly for 3 times and tissues were harvested 2 days after last injection. (d) Quantitative analysis of CD103<sup>+</sup>CD11c<sup>+</sup> DCs from TILs of DEX<sub>P&A&N</sub>-treated orthotopic Batf3<sup>-/-</sup> and wild-type (WT) HCC mice (n=5). (e) Measurement of tumor size in DEX<sub>P&A&N</sub>-treated orthotopic Batf3<sup>-/-</sup> and WT HCC mice (n=5). (f) Flow cytometric analysis of NK cells in blood of orthotopic HCC mice on day 23 after tumor inoculation. \*p<0.05, \*\*p<0.001; n.s means not significant; One way-ANOVA post hoc Student-Newman-Keuls test was used.

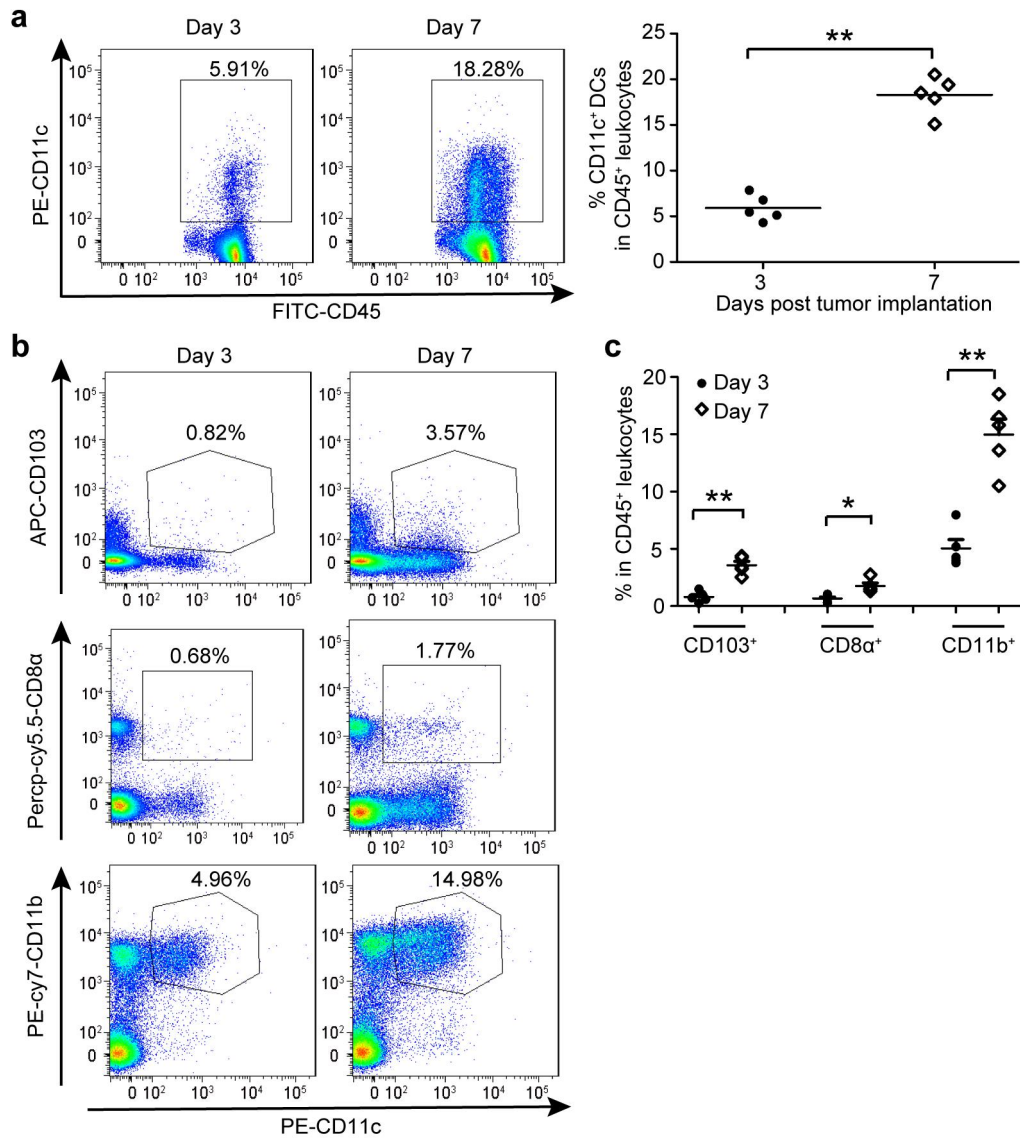

**Supplementary Figure 6.** Analysis of DCs in blood of orthotopic HCC mice treated with Flt3L. Flt3L (800  $\mu\text{g}/\text{kg}/\text{day}$ ) was injected into day-3 orthotopic HCC mice subcutaneously for 8 days consecutively and blood was collected at day 3 and day 7 after tumor inoculation. Flow cytometric and quantitative analysis of CD11c<sup>+</sup> (**a**) and CD103<sup>+</sup>CD11c<sup>+</sup>, CD8 $\alpha$ <sup>+</sup>CD11c<sup>+</sup> and CD11b<sup>+</sup>CD11c<sup>+</sup> (**b** and **c**) DCs in blood of orthotopic HCC mice on day 3 and 7 after tumor inoculation (n=5; two-tailed t test).

\*p<0.05, \*\*p<0.001; n.s means not significant.

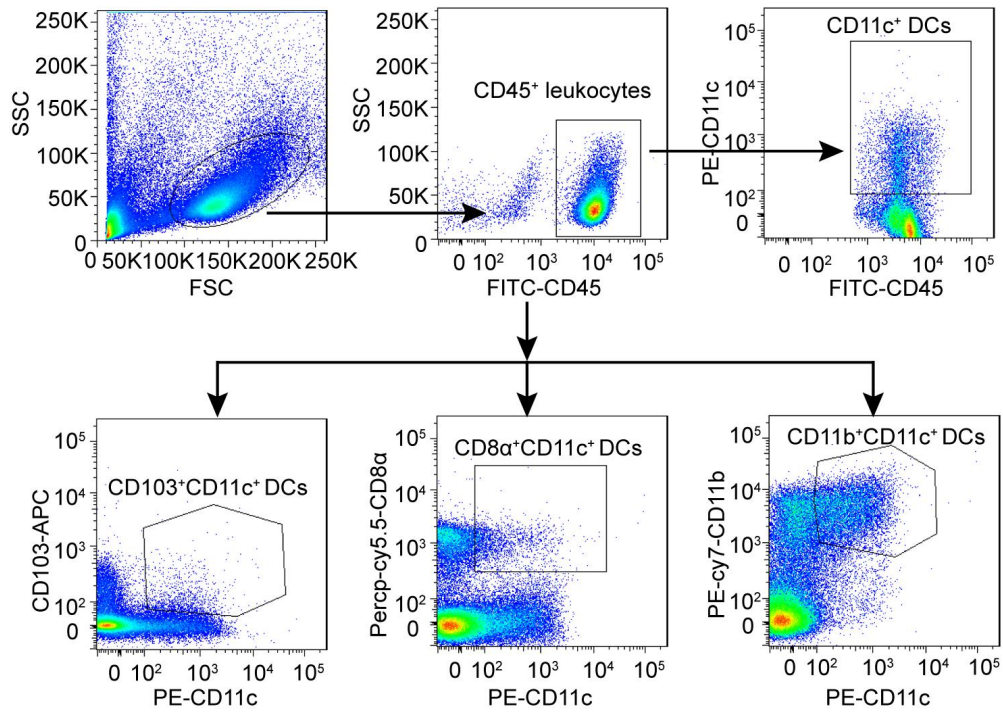

**Supplementary Figure 7.** Representative gating information for the flow cytometric analysis of different DC subsets in mouse peripheral blood.



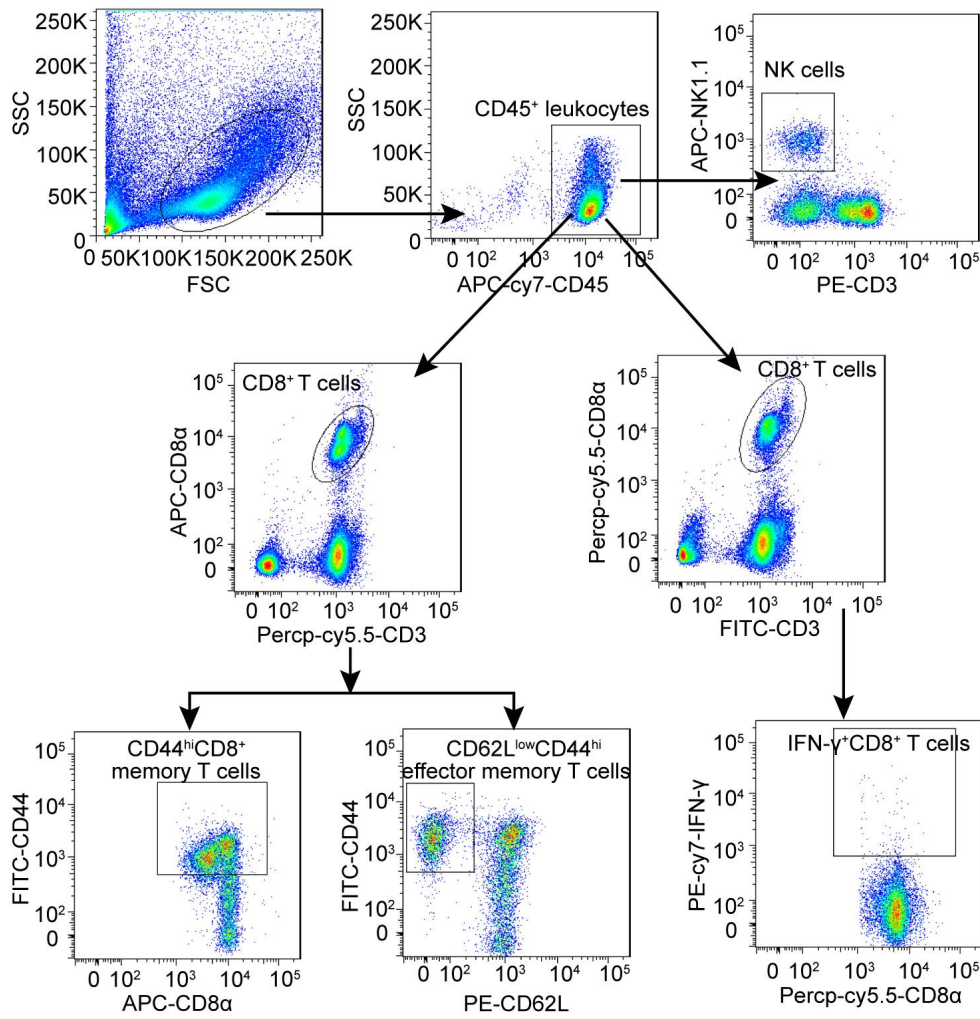

**Supplementary Figure 8.** Representative gating information for the flow cytometric analysis of different lymphocytes, effector and memory T cells in mouse peripheral blood.

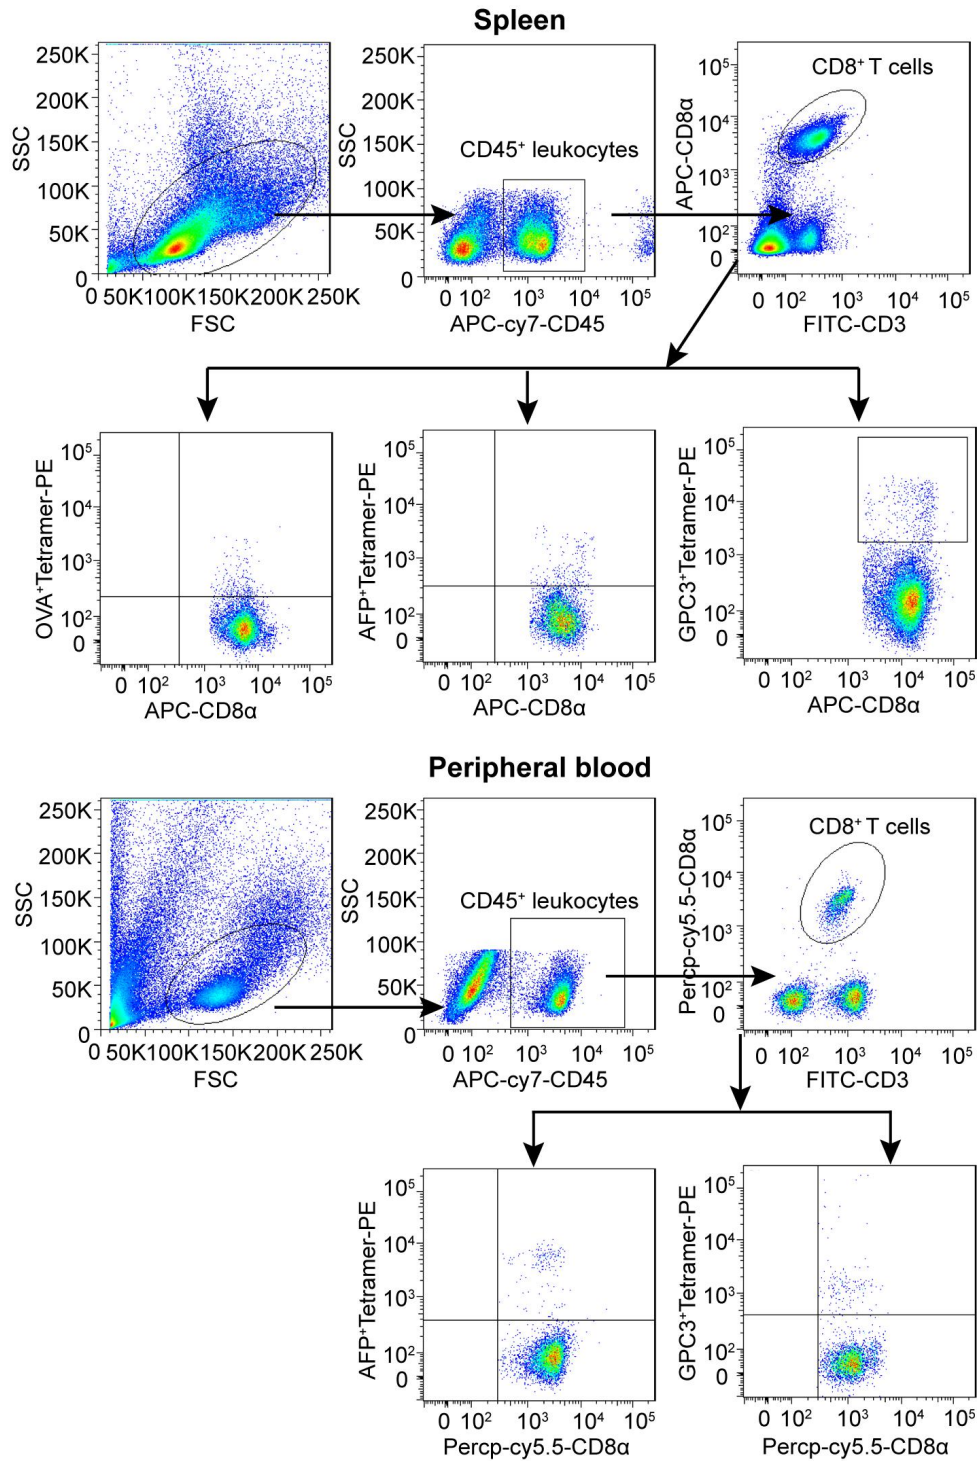

**Supplementary Figure 9.** Representative gating information for the flow cytometric analysis of different antigen-specific T cells in mouse spleen and peripheral blood.

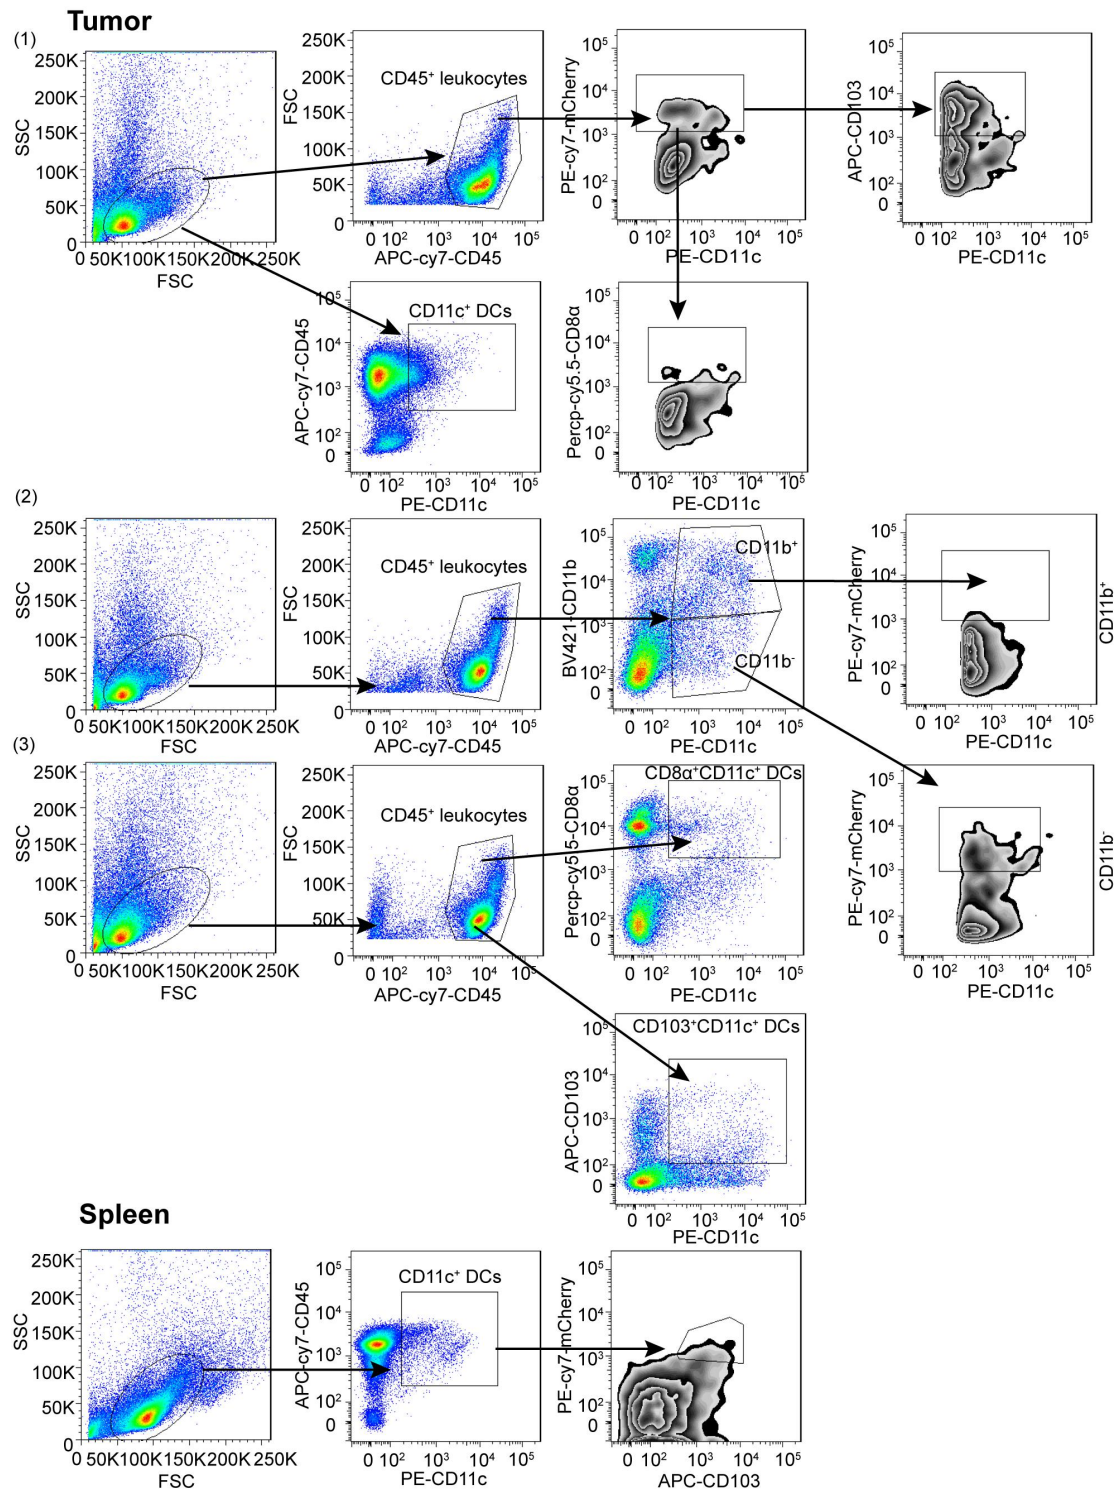

**Supplementary Figure 10.** Representative gating information for the flow cytometric analysis of different DC or mCherry<sup>+</sup> DC subsets in tumor and spleen. (1)-(3) represents different DC or mCherry<sup>+</sup> DC subsets in tumor.

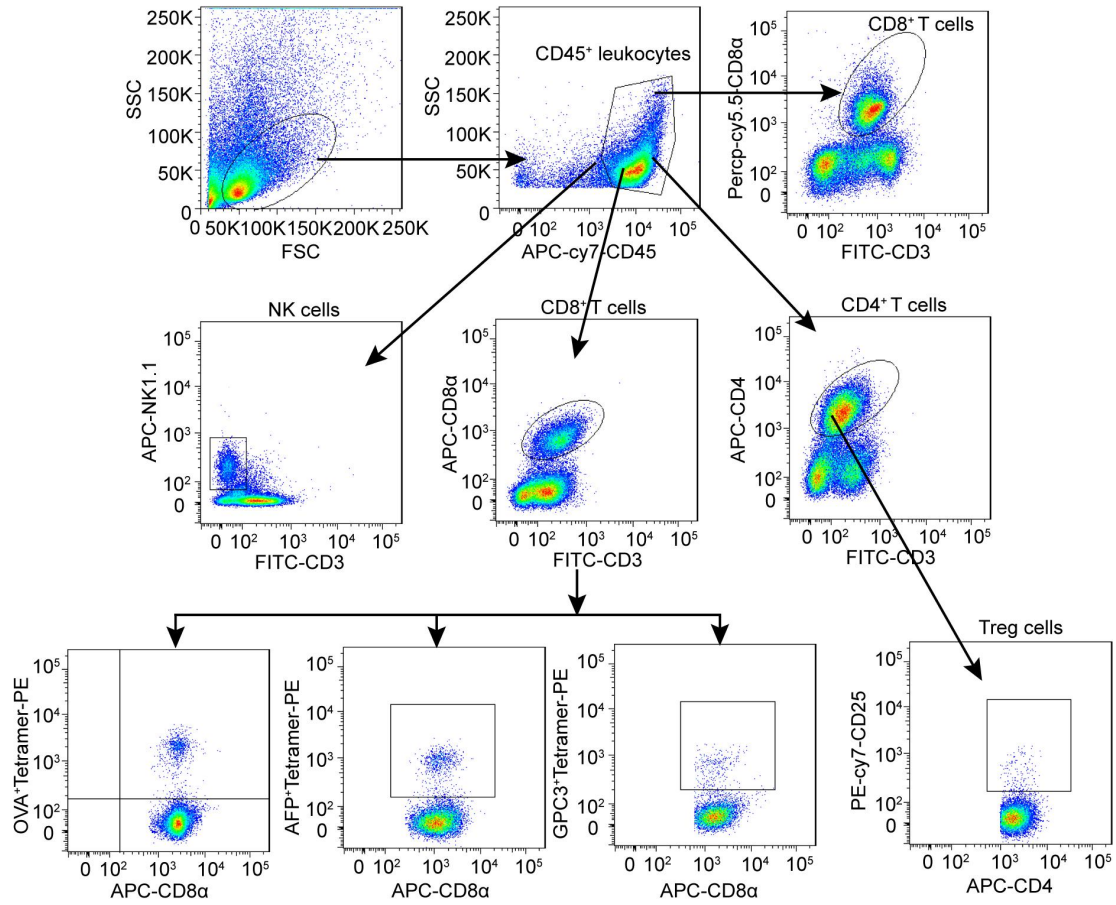

**Supplementary Figure 11.** Representative gating information for the flow cytometric analysis of different lymphocytes, Tregs and antigen-specific T cells in tumor.
